# Supplementary material for: Leptin signaling impairs macrophage defenses against Salmonella Typhimurium
Source: PubMed Central journal article supplement — Proc Natl Acad Sci U S A. 2019 Jul 26;116(33):16551–60. doi: 10.1073/pnas.1904885116 (PMC6697794; doi:10.1073/pnas.1904885116), 2019-07-26
Supplement: pnas.1904885116.sapp.pdf [file pnas.1904885116.sapp.pdf]

## Supplementary Information for

### **Leptin signaling impairs macrophage defenses against *Salmonella* Typhimurium**

Julia Fischer, Saray Gutiérrez, Raja Ganesan, Chiara Calabrese, Rajeev Ranjan, Gökhan Cildir, Nina Hos, Jan Rybniker, Martina Wolke, Jochen W.U. Fries, Vinay Tergaonkar, Georg Plum, Adam Antebi and Nirmal Robinson

Corresponding author: Nirmal Robinson

Email: [nirmal.robinson@unisa.edu.au](mailto:nirmal.robinson@unisa.edu.au)

### **This PDF file includes:**

Figs. S1 to S6

**Fig-S1**

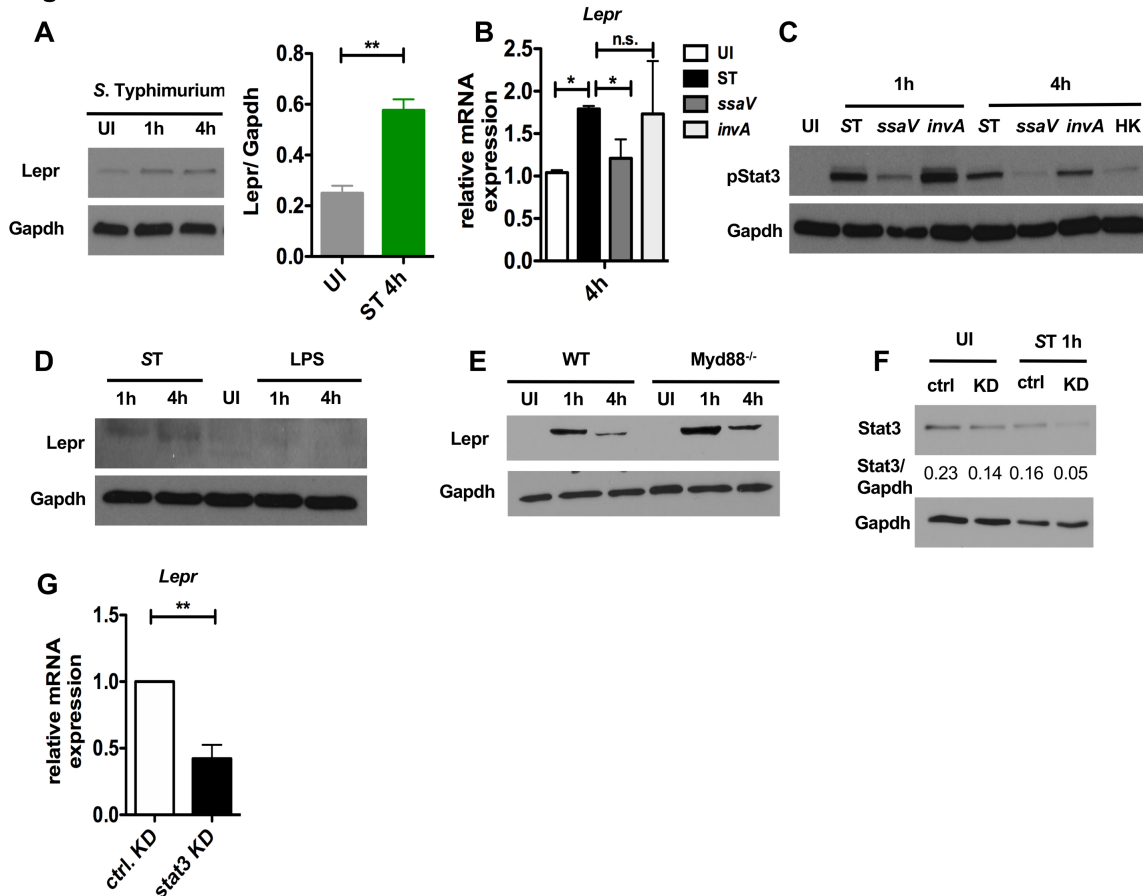

**Fig. S1.**

(A) Immunoblot analysis of Lepr expression in BMDMs and blots quantified using Image-Jâ. (B) Relative Lepr mRNA expression to Hprt in WT BMDMs 4h post *S. Typhimurium*,  $\Delta ssaV$  and  $\Delta invA$  infection. (C) Immunoblot analysis of phospho-Stat expression in WT BMDMs infected with *S. Typhimurium*,  $\Delta ssaV$  and  $\Delta invA$  mutant strains. (D) Westernblot analysis of Lepr expression in WT BMDMs infected with ST, heat-killed *S. Typhimurium* (HK). (E) Immunoblot analysis of Lepr in uninfected and infected BMDMs from WT and Myd88<sup>-/-</sup> mice. (F) Immunoblot analysis of Stat3 siRNA mediated knock-down. (G) Relative Lepr mRNA expression in uninfected control siRNA and Stat3 siRNA mediated knock-down (n=2). (Data are shown as mean  $\pm$  S.E.M. and statistical significance calculated using student t-test and represented as \*= $p < 0.05$ ; \*\*= $p < 0.01$ ; \*\*\*= $p < 0.001$ ).

Fig-S2

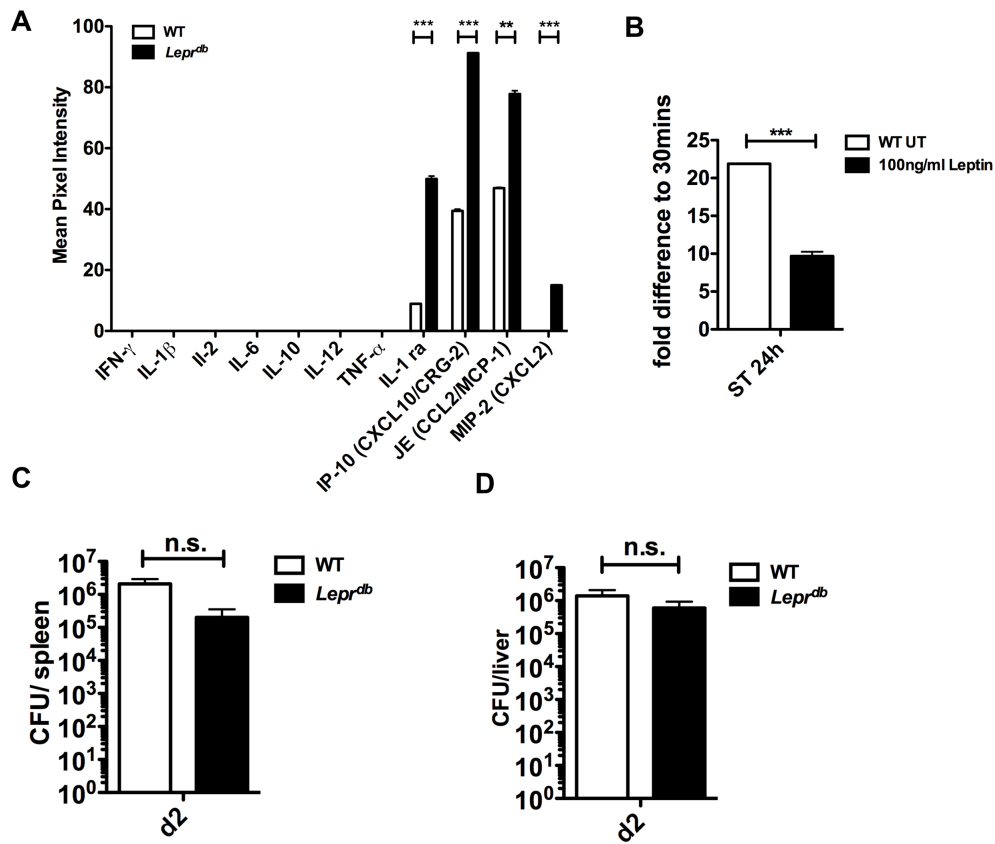

Fig. S2.

(A) Analysis of cytokine array in uninfected WT and *Lep<sup>rd</sup>* BMDMs (n=1). (B) Bacterial burden in untreated and Leptin 100ng/ml treated BMDMs (n=2). (C) Bacterial load in spleen from WT and *Lep<sup>rd</sup>* mice 2days post *S. Typhimurium* infection (n=1). (D) Bacterial load in liver from WT and *Lep<sup>rd</sup>* mice 2days post *S. Typhimurium* infection (n=1).

**Fig-S3**

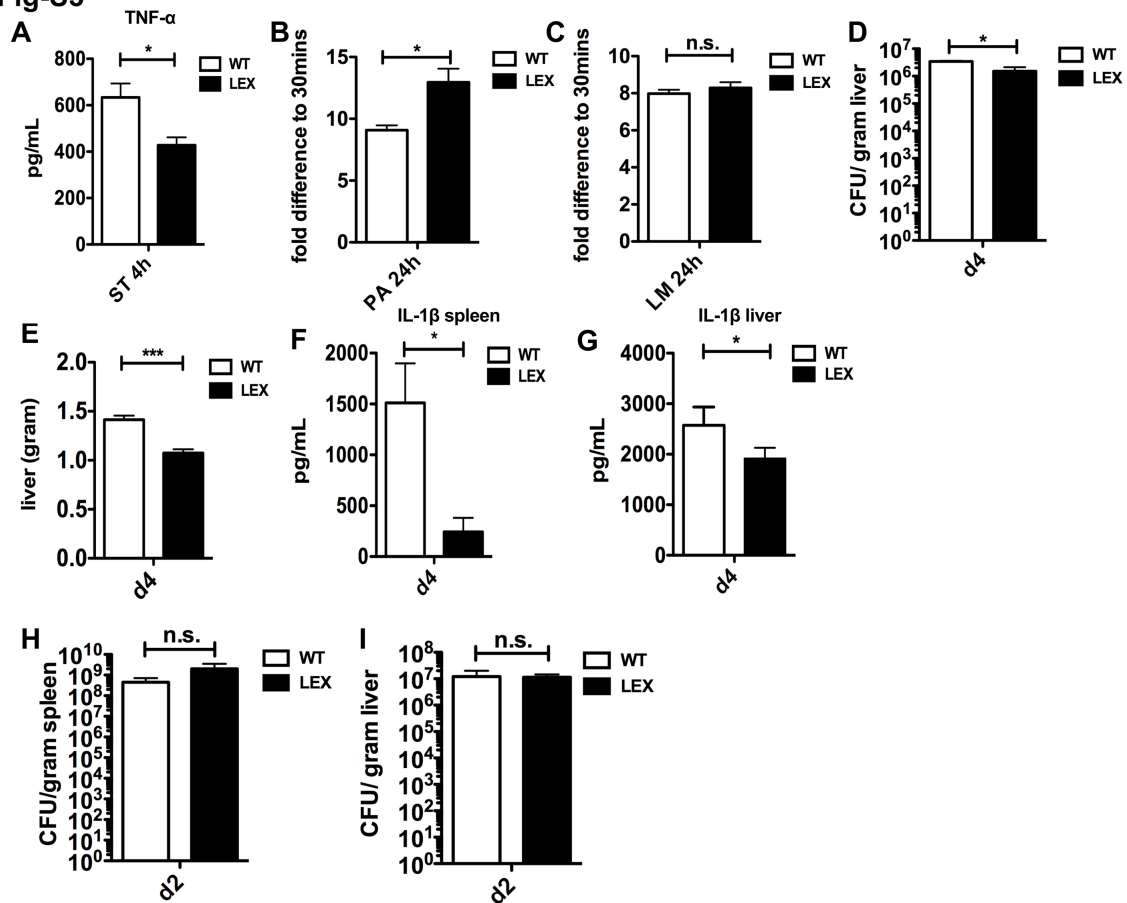

**Fig. S3.**

(A) TNF- $\alpha$  measured in the supernatants of 4h *S. Typhimurium* infected WT and LEX BMDMs (n=3). (B) Bacterial burden in WT versus LEX BMDMs infected with *P. aeruginosa* (PA) 24h post infection. (C) Bacterial burden in WT versus LEX BMDMs infected with *L. monocytogenes* (LM) 24h post infection. (D) Bacterial load in the liver from LEX compared to WT mice 4 days post intravenous infection (n=3). (E) Weight of liver from LEX compared to WT mice 4 days post intravenous infection (n=3). (F) IL-1 $\beta$  measured by ELISA from WT and LEX spleens 4 days post infection. (G) IL-1 $\beta$  measured by ELISA from WT and LEX spleens 4 days post infection. (H) Bacterial load in spleen from WT and LEX mice 2days post *S. Typhimurium* infection (I) Bacterial load in liver from WT and LEX mice 2days post *S. Typhimurium* infection. Data are shown as mean  $\pm$  S.E.M. and statistical significance calculated using student t-test and represented as \*= $p$ <0.05; \*\*= $p$ <0.01; \*\*\*= $p$ <0.001.

**Fig-S4**

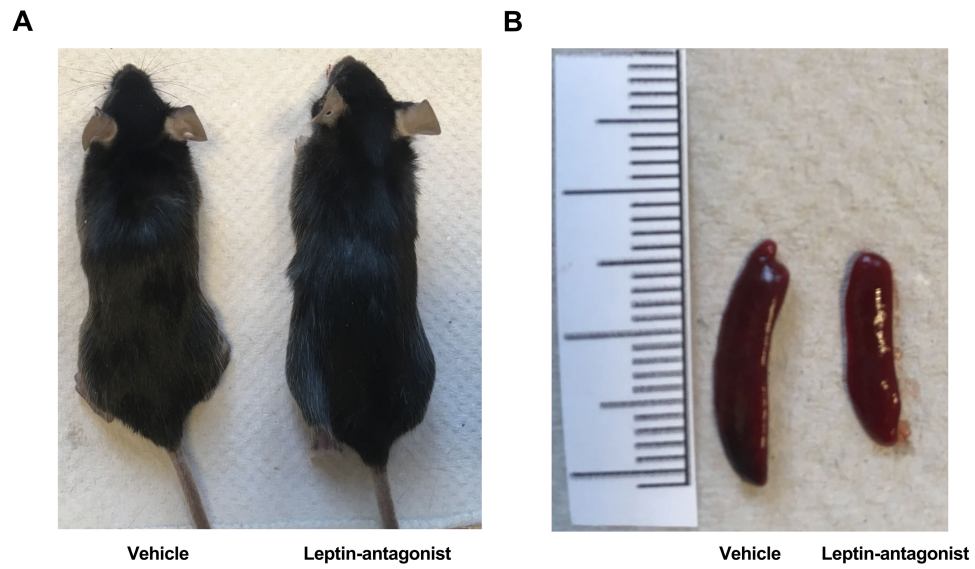

**Fig. S4.**

(A) Leptin-antagonist and vehicle treated-WT mice infected with *S. Typhimurium* on day 4 post infection (n=1). (B) Spleen size on day4 post-infection (n=1).

Fig-S5

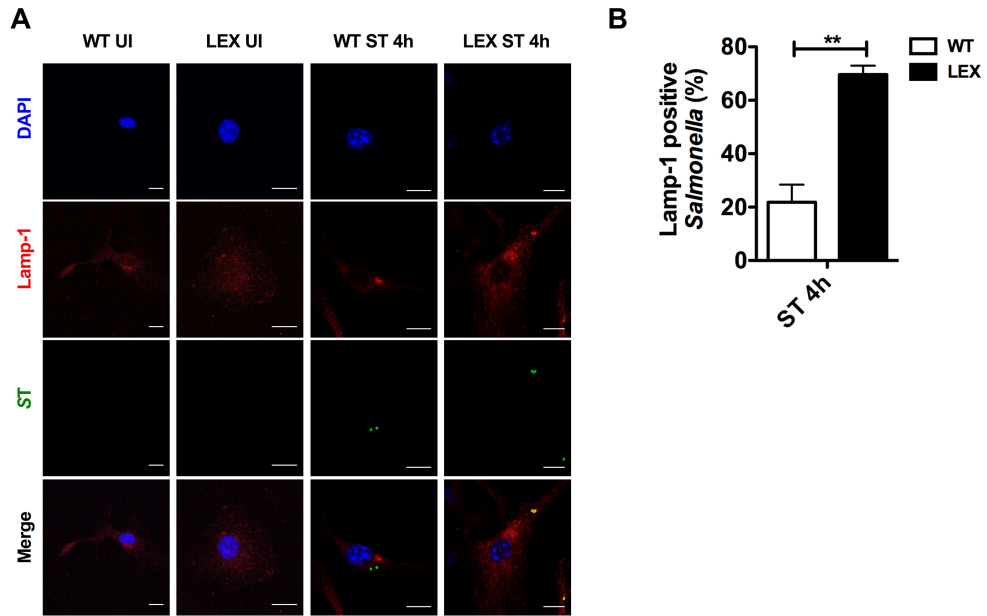

**Fig. S5.**

(A) Confocal microscopy analysis of UI and 4h infected WT and LEX BMDMs stained for *S. Typhimurium* LPS and Lamp-1 (n=1). (B) Bar graph shows *S. Typhimurium*-Lamp-1 colocalization in WT and LEX BMDMs 4h post infection.

**Fig-S6**

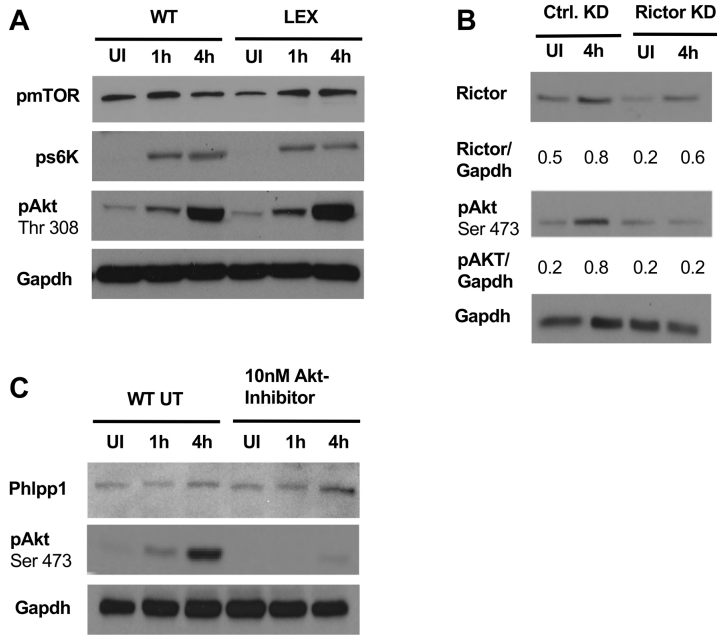

**Fig. S6.**

(A) Immunoblot analysis of mTORC1 pathway in WT and LEX BMDMs infected with *S. Typhimurium* for 1h and 4h compared to UI (n=3). (B) Immunoblot analysis of Rictor siRNA transfected WT BMDMs versus control siRNA transfected cells infected with *S. Typhimurium* for 4h for Rictor and phospho-Akt Ser 473 (n=3). (C) Immunoblot of Akt-Inhibitor treated and untreated WT BMDMs 1h and 4h post infection compared to UI analyzed for Phlpp1 and phospho-AKT-Ser 473 (n=3).
